# Supplementary material for: Collaborative Care for Mental Health in Low- and Middle-Income Countries: A WHO Health Systems Framework Assessment of Three Programs
Source: Atypon-hosted journal article supplement (doi:10.1176/appi.ps.201700232), 2017-08-01
Supplement: appi.ps.201700232.ds001.pdf [file appi.ps.201700232.ds001.pdf]

 


Psychiatry Online
