# Supplementary material for: Collaborative Care for Mental Health in Low- and Middle-Income Countries: A WHO Health Systems Framework Assessment of Three Programs
Source: Atypon-hosted journal article supplement (doi:10.1176/appi.ps.201700232), 2017-08-01
Supplement: appi.ps.201700232.ds001.pdf [file appi.ps.201700232.ds001.pdf]

**Supplemental file (online only)**

Summary of challenges and strategies in implementing the Collaborative Care Model for mental health services using the World Health Organization Health Systems Framework

| Categories/Challenge                                                      | Strategies                                                                                                                                                                                           |
|---------------------------------------------------------------------------|------------------------------------------------------------------------------------------------------------------------------------------------------------------------------------------------------|
| <b>Leadership/governance</b>                                              |                                                                                                                                                                                                      |
| Health system leadership deprioritizing mental health                     | Correct misconceptions about burden of disease and treatment efficacy<br><br>Integrate mental health services in priority areas like HIV/AIDS, maternal and child health and humanitarian responses. |
| Lack of regulatory environment to support high quality mental health care | Support legal and other avenues to ensure parity of mental health care with other services.<br><br>Build mental health quality standards into the healthcare system                                  |
| New roles for psychiatrists in CoCM                                       | Leadership of professional societies and health medical training institutions supports this new role                                                                                                 |
| <b>Health care financing</b>                                              |                                                                                                                                                                                                      |
| Low budget allocation for MH                                              | Emphasize high economic returns on mental health services<br><br>Emphasize improved outcomes in comorbidities such as HIV, TB, maternal and child health, and diabetes.                              |
| User fees limit access to care for the most vulnerable patients           | Support universal health care or other insurance mechanisms to avoid point-of-care fees                                                                                                              |
| <b>Health Workforce</b>                                                   |                                                                                                                                                                                                      |
| Lack of healthcare workforce to work as on-site CMs                       | Train existing health workers with transferable skills and support standardized training for counselors and care managers.                                                                           |
| Psychiatrists not available for consultation and supervision              | Recruit part-time, visiting and off-site psychiatrists, with particular emphasis on academic clinicians.                                                                                             |

|                                                                                                                                   |                                                                                                                                                                                                                                 |
|-----------------------------------------------------------------------------------------------------------------------------------|---------------------------------------------------------------------------------------------------------------------------------------------------------------------------------------------------------------------------------|
| Lack of training for Psychiatrists in CoCM                                                                                        | Develop specialized training for LMIC-based psychiatrists on CoCM. Early career psychiatrists may be more interested in CoCM vs traditional model.                                                                              |
| PCP absenteeism and turnover                                                                                                      | <p>Preferentially train and support non-physician clinicians, who are more likely to be retained.</p> <p>Emphasize overall health systems strengthening and team culture, which outlast individual health workers</p>           |
| Substantial variation in prior mental health training among PCPs, and lack of any mental health training in some medical schools. | Provide standardized training for PCPs after graduation but also support standard mental health curricula in medical and other health professional schools                                                                      |
| PCPs are concerned about being overburdened with new clinical tasks.                                                              | <p>Share certain tasks (e.g. hour-long psychosocial assessment) with BHPs.</p> <p>Emphasize that CoCM replaces non-evidence-based care that is currently being delivered to mental health patients already in their clinic.</p> |
| <b>Medical products and technologies</b>                                                                                          |                                                                                                                                                                                                                                 |
| Stock-outs of essential psychotropic medications                                                                                  | Strengthen overall supply-chain and inventory management                                                                                                                                                                        |
| Lack of diagnostic tools to rule-out other illnesses                                                                              | Strengthen overall diagnostic capacity                                                                                                                                                                                          |
| <b>Information and Research</b>                                                                                                   |                                                                                                                                                                                                                                 |
| Lack of Medical Records to track patients in CoCM                                                                                 | Strengthen overall record-keeping                                                                                                                                                                                               |
| Lack of communication systems for tele-consultation                                                                               | Strengthen overall communication infrastructure                                                                                                                                                                                 |
| Cross-culturally valid scales and tools                                                                                           | Utilize research from social sciences                                                                                                                                                                                           |
| <b>Service Delivery</b>                                                                                                           |                                                                                                                                                                                                                                 |
| Poor follow-up among patients                                                                                                     | Utilize community health workers to facilitate follow-up                                                                                                                                                                        |
| Lack of continuity of care with the same provider                                                                                 | BHPs, community health workers and psychiatrists                                                                                                                                                                                |

|                                                                                                      |                                                                                                                                                                                              |
|------------------------------------------------------------------------------------------------------|----------------------------------------------------------------------------------------------------------------------------------------------------------------------------------------------|
| because of urgent care model in clinics                                                              | provide continuity of care                                                                                                                                                                   |
| Lack of availability of intensive treatment services like inpatient and day-hospitals                | Partner with referral centers and assist patients and families in navigating the system in urban centers                                                                                     |
| <b>Additional Challenges (not captured by the WHO framework)</b>                                     |                                                                                                                                                                                              |
| Lack of social services to support patients while they receive concurrent mental healthcare services | Partner with non-health organizations that provide support for victims of domestic violence, child abuse and food insecurity.<br><br>Advocate for social services alongside health services. |
| Persistent stigma in the community, among patients and healthcare providers                          | Deliberately address stigma across the spectrum, while simultaneously providing high-quality, effective treatment, which helps reduce stigma.                                                |

*CoCM: Collaborative Care Model*

*PCP: Primary Care Provider*

*CM: Care Manager*

*WHO: World Health Organization*
